# Supplementary material for: Enhancement of photocatalytic activity for BiPO4via phase junction
Source: Royal Society of Chemistry journal article supplement (doi:10.1039/c4ta01807a), 2014-01-01
Supplement: c4ta01807a1.pdf [file c4ta01807a1.pdf]

## Supporting Information:

### Enhancement of Photocatalytic Activity for BiPO<sub>4</sub> via Phase Junction

*Yanyan Zhu, Yanfang Liu, YanhuiLv, Qiang Lin, Di Liu, Yongfa Zhu\**

**Corresponding author:** *Yongfa Zhu*; Address: Department of Chemistry, Tsinghua University, Beijing,100084,

China; Fax: (+86)10-6278-7601; Tel.: (+86) 10-6278-7601; Email: [zhuyf@mail.tsinghua.edu.cn](mailto:zhuyf@mail.tsinghua.edu.cn)

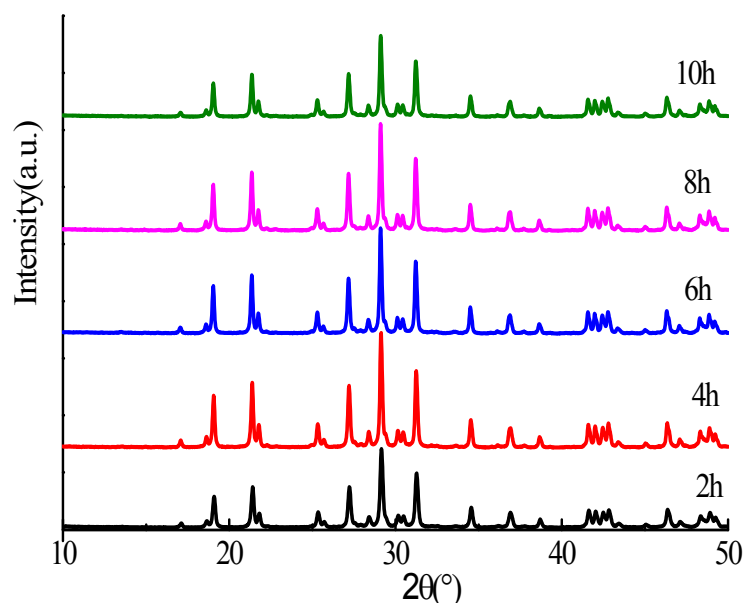

Fig.S1 XRD patterns of BiPO<sub>4</sub> synthesized by calcinating HBIP at 500 °C for different times

When calcination temperature was set at 500 °C, calcination time hardly affected the phase structures of BiPO<sub>4</sub>(Fig.S1). The major peaks at 19.0°, 21.4°, 27.2° and 31.3° were ascribed to (011), (-111), (200) and (012) lattice plane of nMBIP (P21/n, JCPDS 089-0287), and a little quantity of peaks at 22.3° and 35.8° were ascribed to (110) and (-121) lattice plane of mMBIP (P21/m, JCPDS 077-2208). The phase structures of BiPO<sub>4</sub> calcinated at 500 °C for different times were formed by nMBIP and mMBIP.

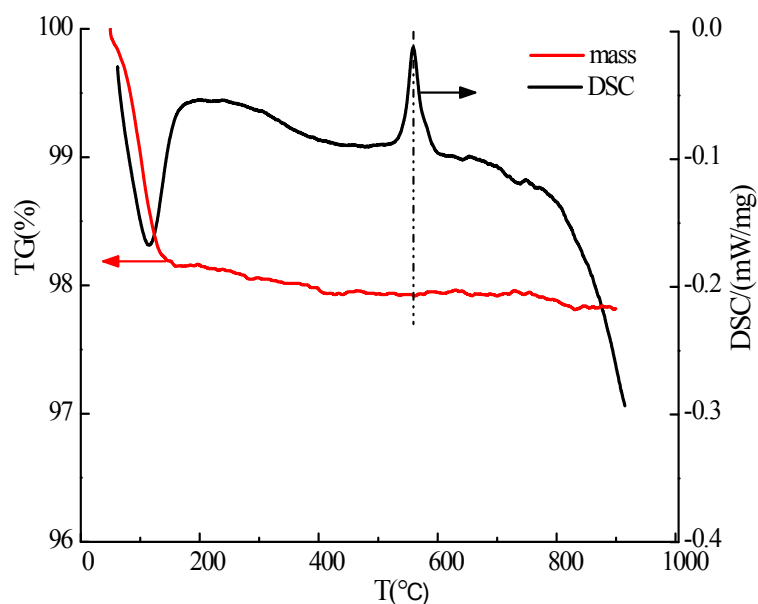

Fig.S2 TG and DSC of precursor HBIP

As can be seen from Fig.S2, the 2.0% obvious weight loss occurring from 90 °C to 150 °C could be attributed to the desorption of surface bound water, and an endothermic peak around 100 °C in the DSC curve consisted with that. Moreover, a sharp exothermic peak situated at 550 °C resulted from the phase transformation of BiPO<sub>4</sub>. Because the analysis of TG and DSC were processed at continuous heating-up, so the information of measurement couldn't reflect the transformation details of three kinds of BiPO<sub>4</sub> phase structure.

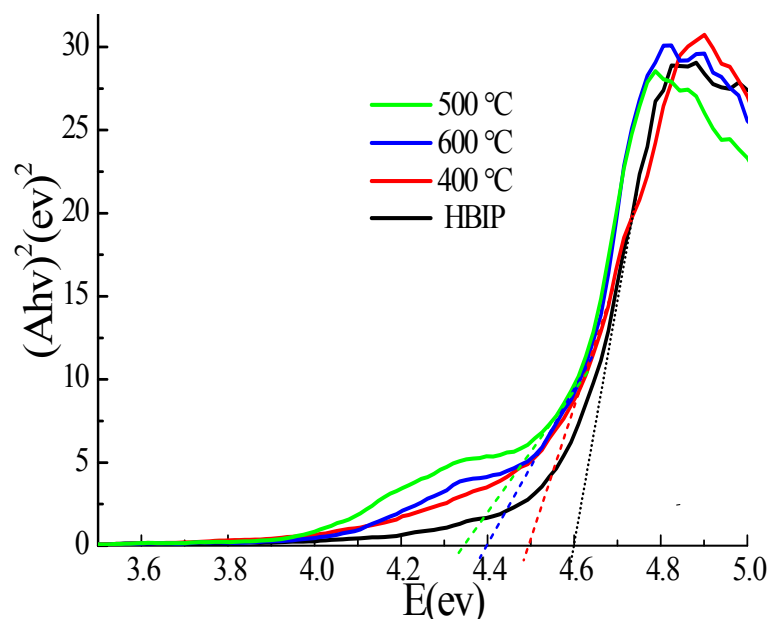

Fig.S3Tauc's plot of  $(Ahv)^2$  versus photon energy for the optical band gap calculation for HBIP and BiPO<sub>4</sub>calcinated at 400°C, 500°C and 600°C

The optical band gapfor BiPO<sub>4</sub>can be calculated by Tauc's plot.Absorption<sup>1/2</sup> (or absorption<sup>2</sup>) versus photo energy, which may help to distinguish the direct or indirect transition of BiPO<sub>4</sub> crystalphases.From Tauc's plot

the calculated, the band gaps of HBIP and BiPO<sub>4</sub> calcinated at 400°C, 500°C and 600°C are 4.6 eV, 4.5 eV, 4.34 eV and 4.4 eV respectively.

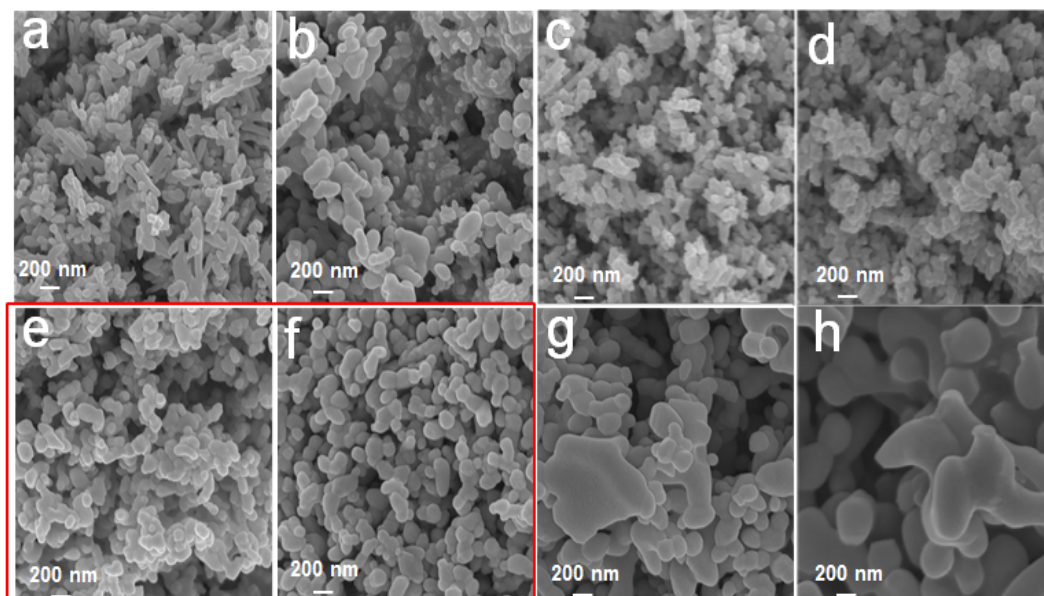

Fig.S4 SEM images of BiPO<sub>4</sub> calcinated at different temperatures for 4h

(a HBIP; b 350°C; c 400°C; d 450°C; e 500°C; f 550°C; g 600°C; h 650°C)

The HBIP precursor was totally composed of homogeneous rod-like particles (Fig.S3). The morphologies of BiPO<sub>4</sub> formed at different calcination temperatures in the range of 350~500 °C were basically the same, and their particles aggregated and became larger in size. The particles of BiPO<sub>4</sub> melted and became larger and larger with calcination temperature increasing above 550 °C.

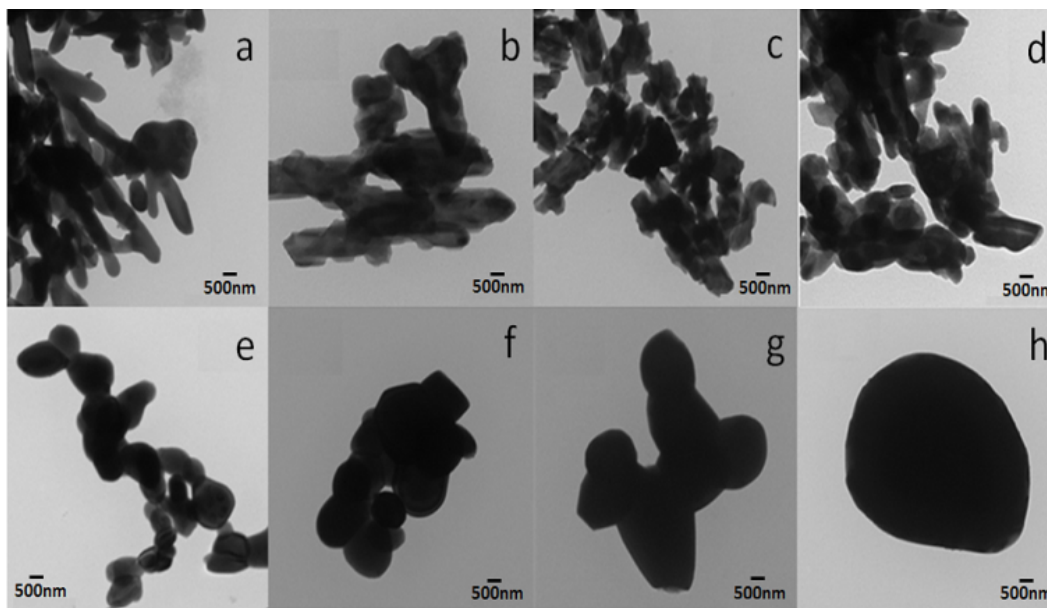

Fig.S5 TEM images of BiPO<sub>4</sub> calcinated at different temperatures for 4h

(a HBIP; b 350°C; c 400°C; d 450°C; e 500°C; f 550°C; g 600°C; h 650°C)

The results of BiPO<sub>4</sub> TEM images were the same as that of SEM (Fig.S4). The particles of BiPO<sub>4</sub> gradually became large in size under 500°C, which was melted into a sphere about several micrometres in diameter at 650 °C.

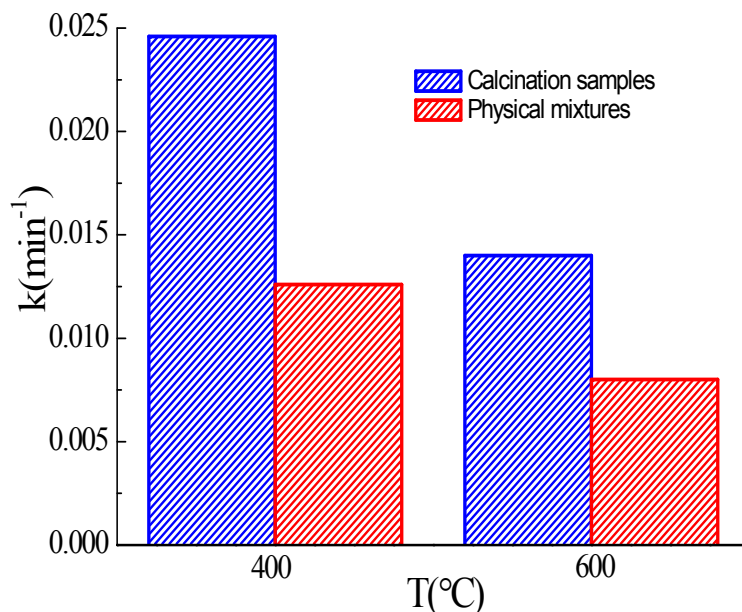

Fig.S6 The comparison of photocatalytic activity between  $\text{BiPO}_4$  calcinated at 400 °C, 600 °C and the physical mixture with corresponding phase ratios

The photocatalytic activities of  $\text{BiPO}_4$  calcinated at 400 °C and 600 °C were both much higher than that of the physical mixed samples with corresponding phase ratios, which further confirmed that phase junction formed and it could significantly improve the photocatalytic performace of  $\text{BiPO}_4$ .

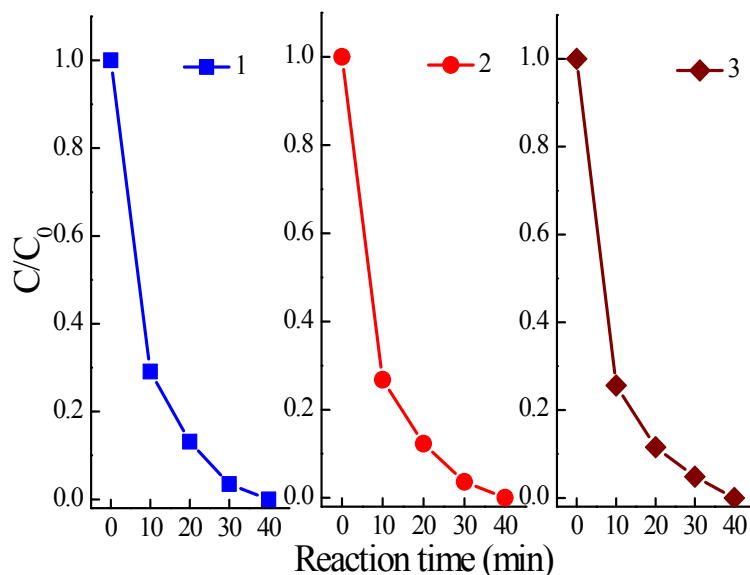

Fig.S7 Parallel experiments of  $\text{BiPO}_4$  calcinated at 500 °C for 6.0 h and on the photocatalytic degradation of methylene blue for three times

Parallel experiments of  $\text{BiPO}_4$  calcinated at 500°C for 6.0 h were performed. As can be seen from the result, the photocatalytic activities of these samples are almost the same, which reveals that the preparation method of  $\text{BiPO}_4$  with phase junction via calcination is controllable and repeatable.
